# Supplementary figures and images for: Quercetin ameliorates celiac-related intestinal inflammation caused by wheat gluten through modulating oxidative stress, Th1/Th2/Treg balance, and intestinal microflora structure
Source: Royal Society of Chemistry journal article supplement (doi:10.1039/d4fo03025g), 2024-01-01

## Main Figure in this manuscript

**Fig 1E**

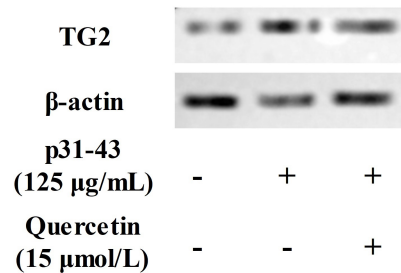

## Raw data in Supplementary Information

**Fig S1**

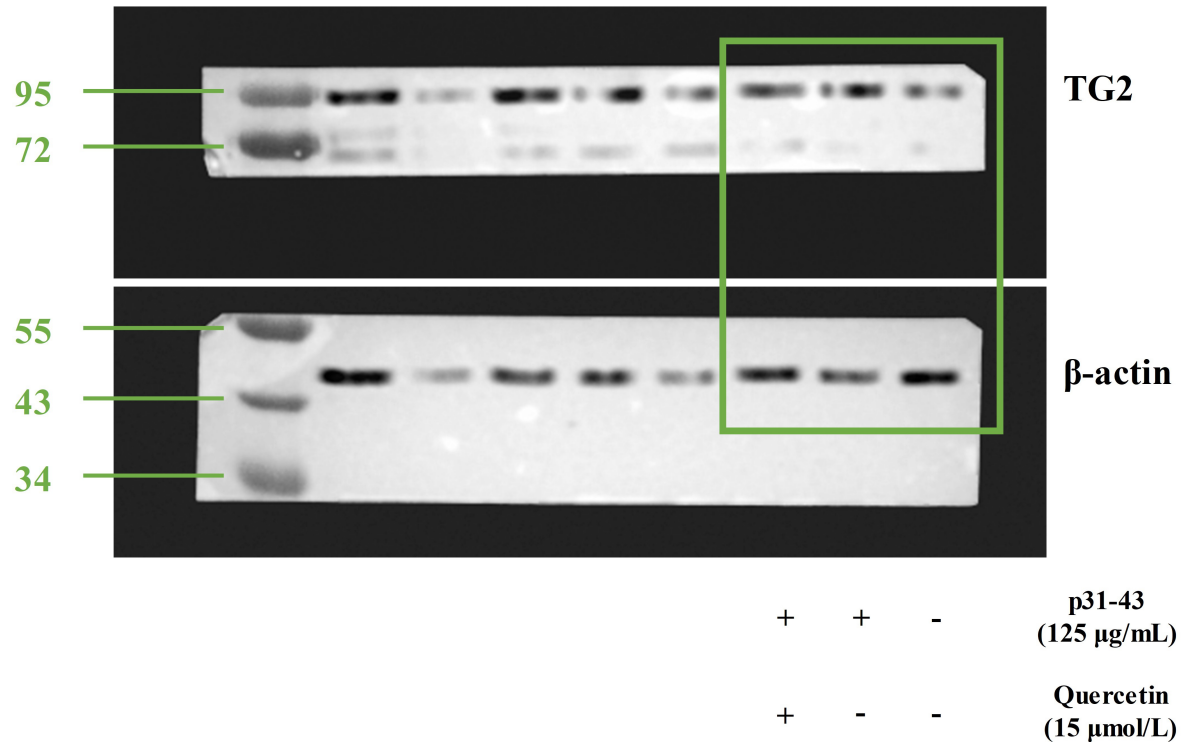

Supplement: d4fo03025g1.pdf [file d4fo03025g1.pdf]

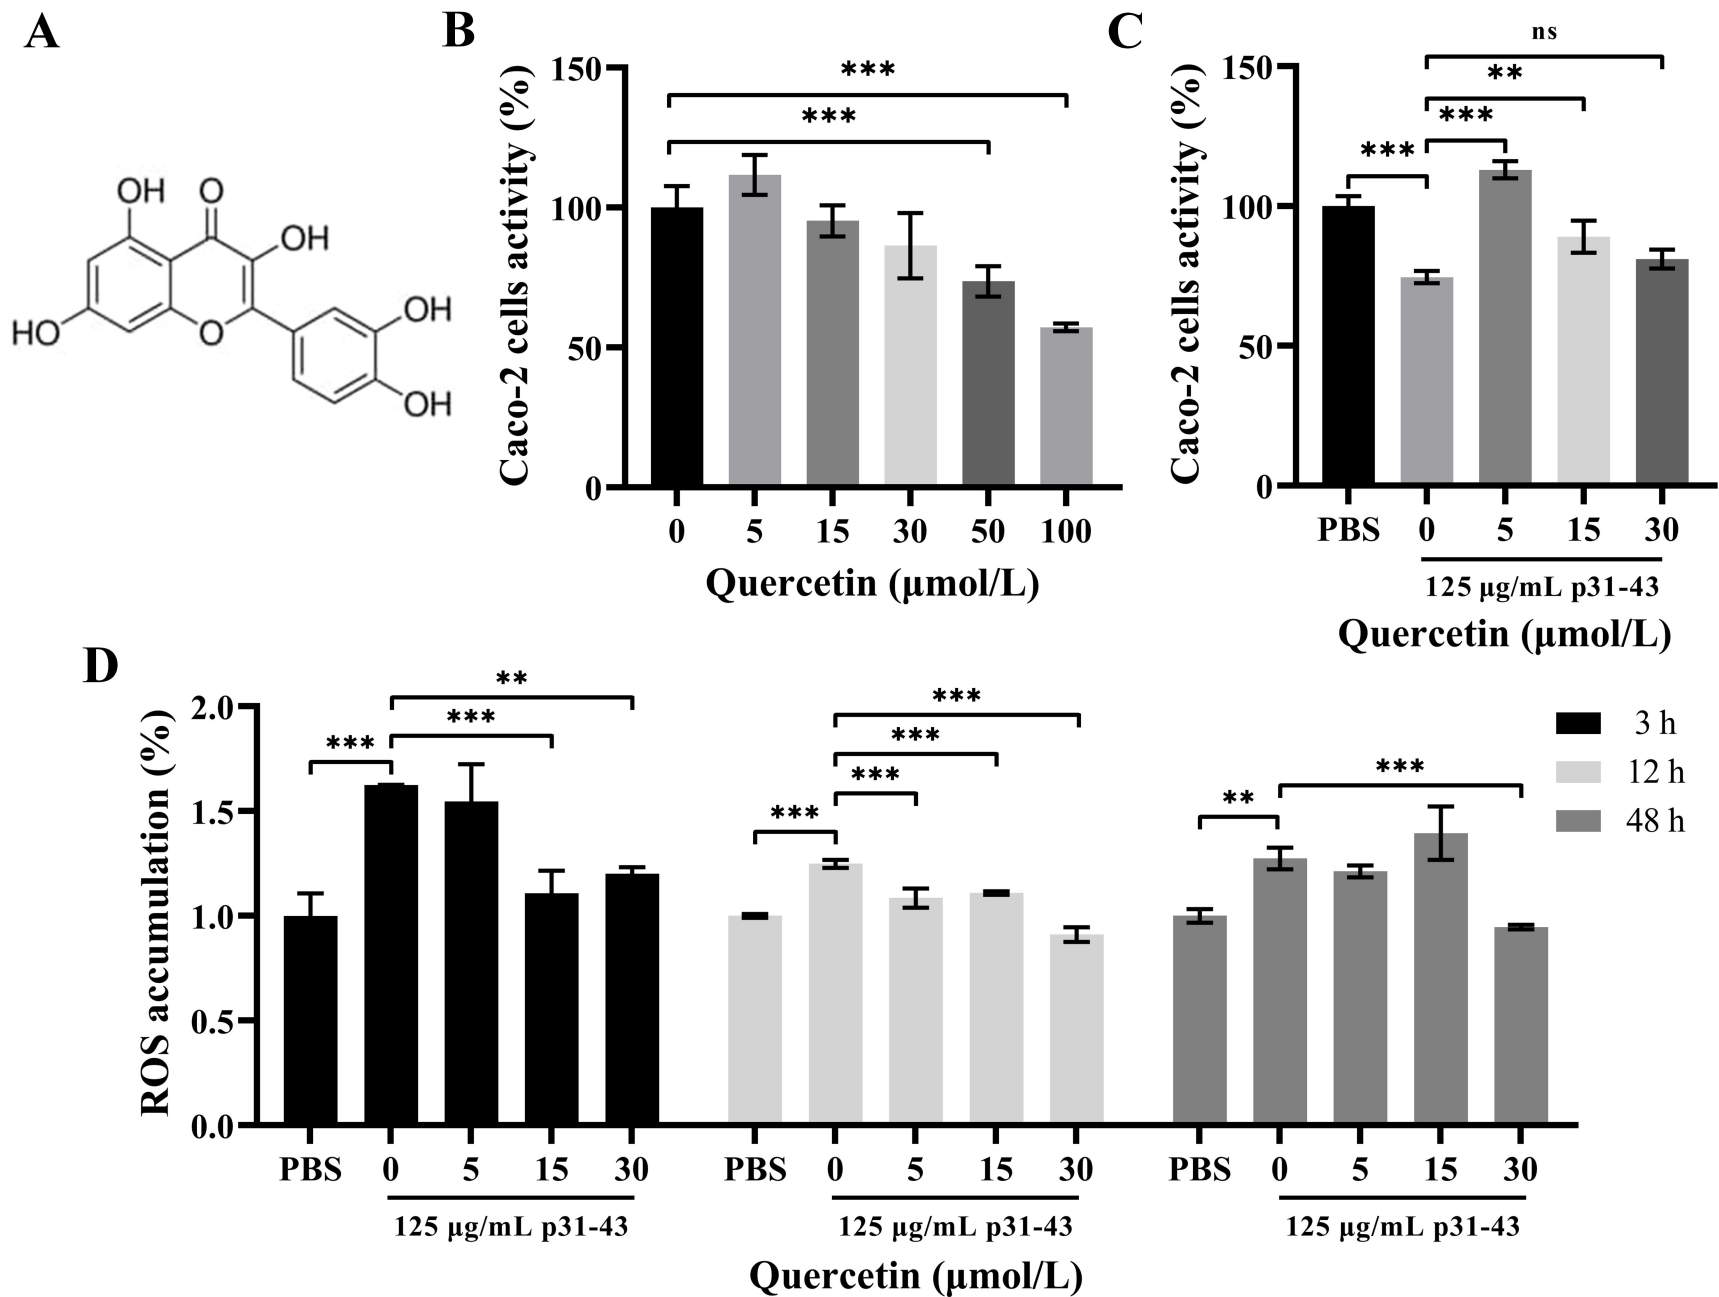

Supplement: d4fo03025g3.pdf [file d4fo03025g3.pdf]

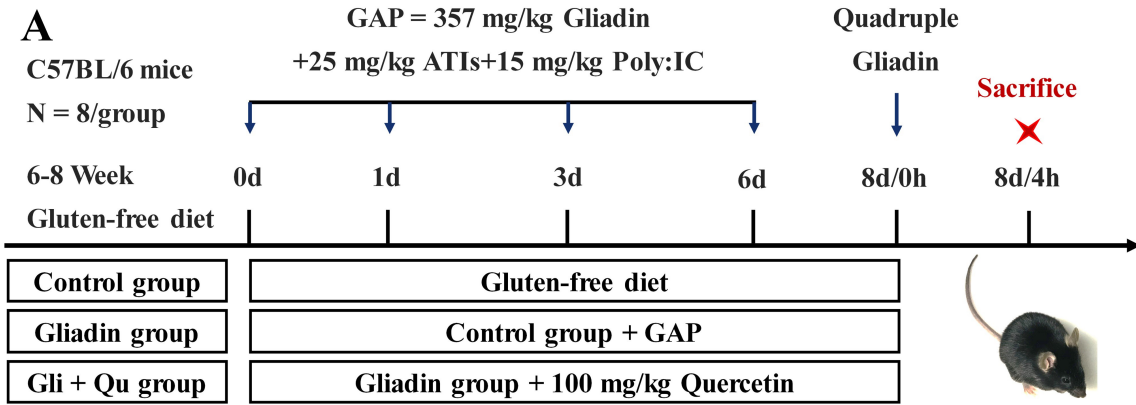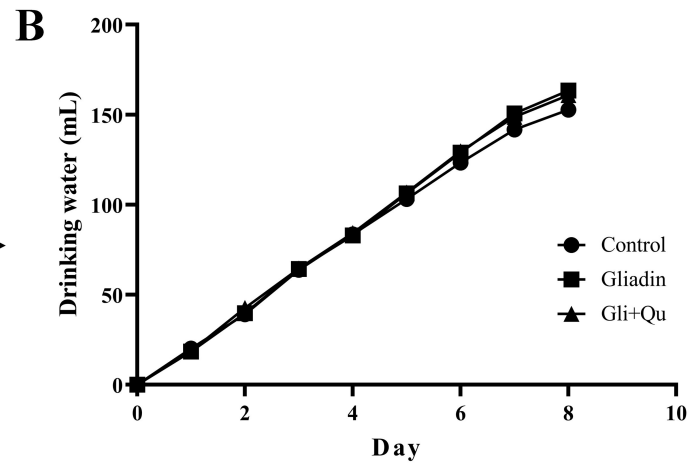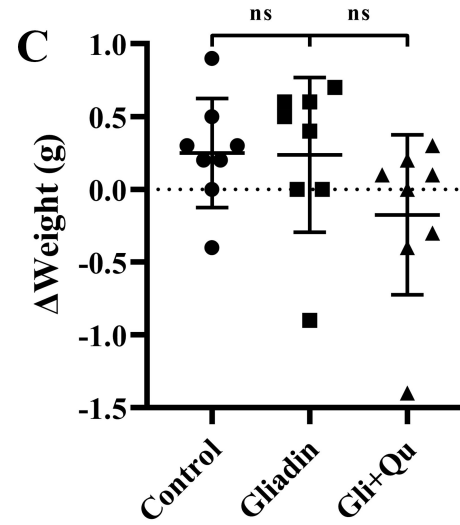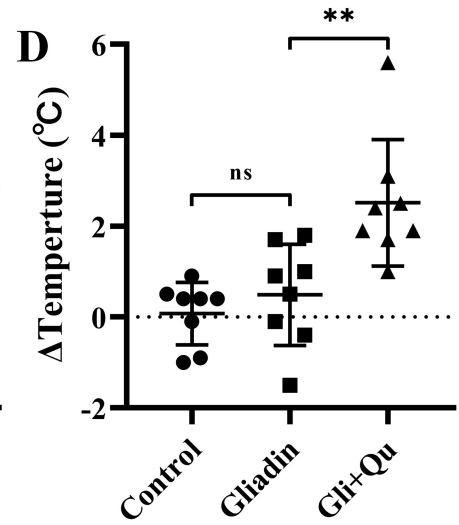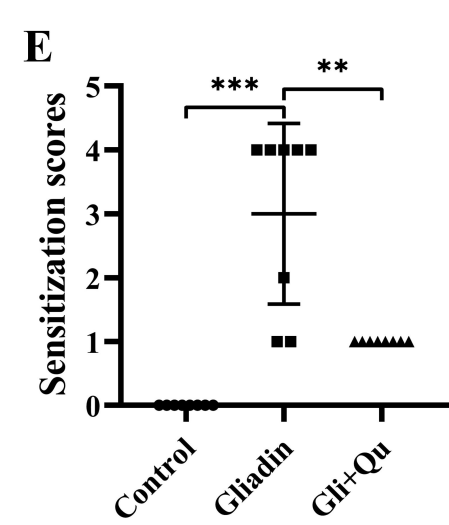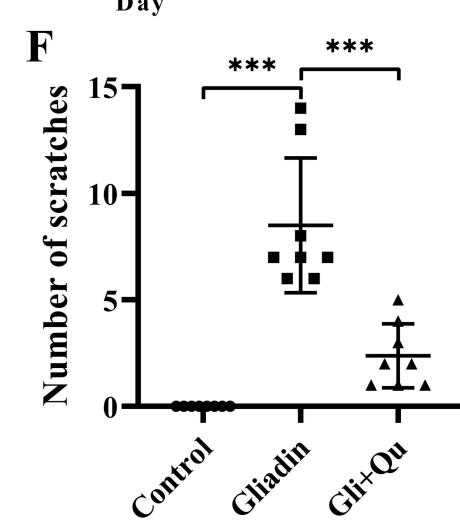

Supplement: d4fo03025g4.pdf [file d4fo03025g4.pdf]

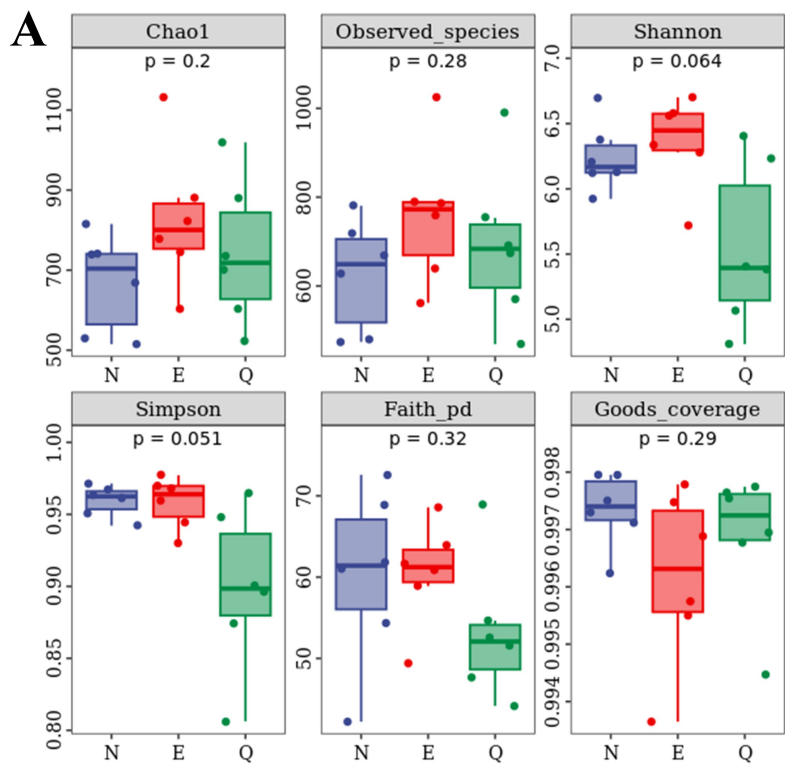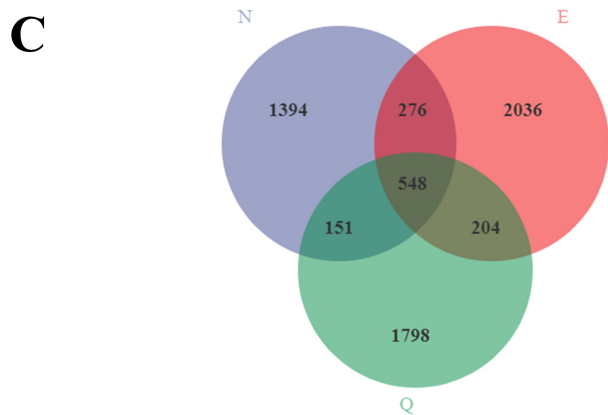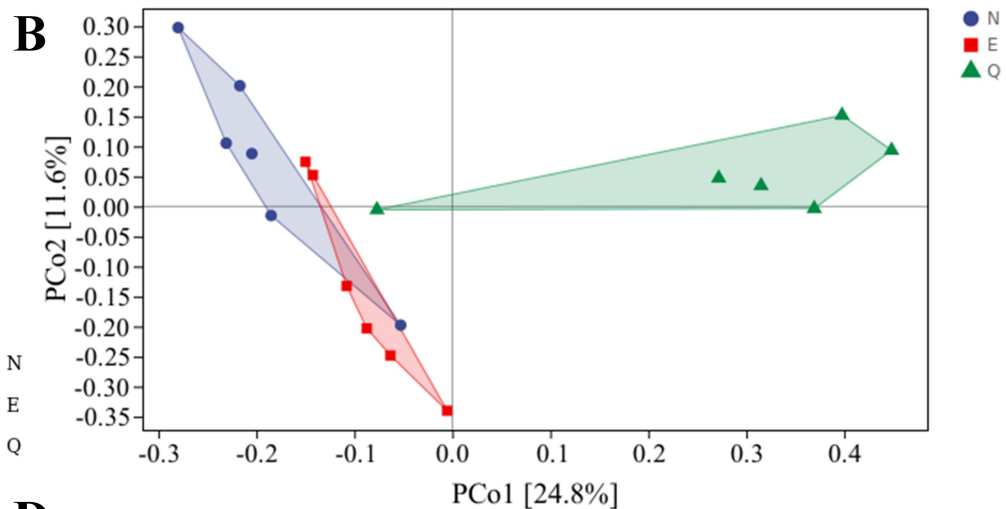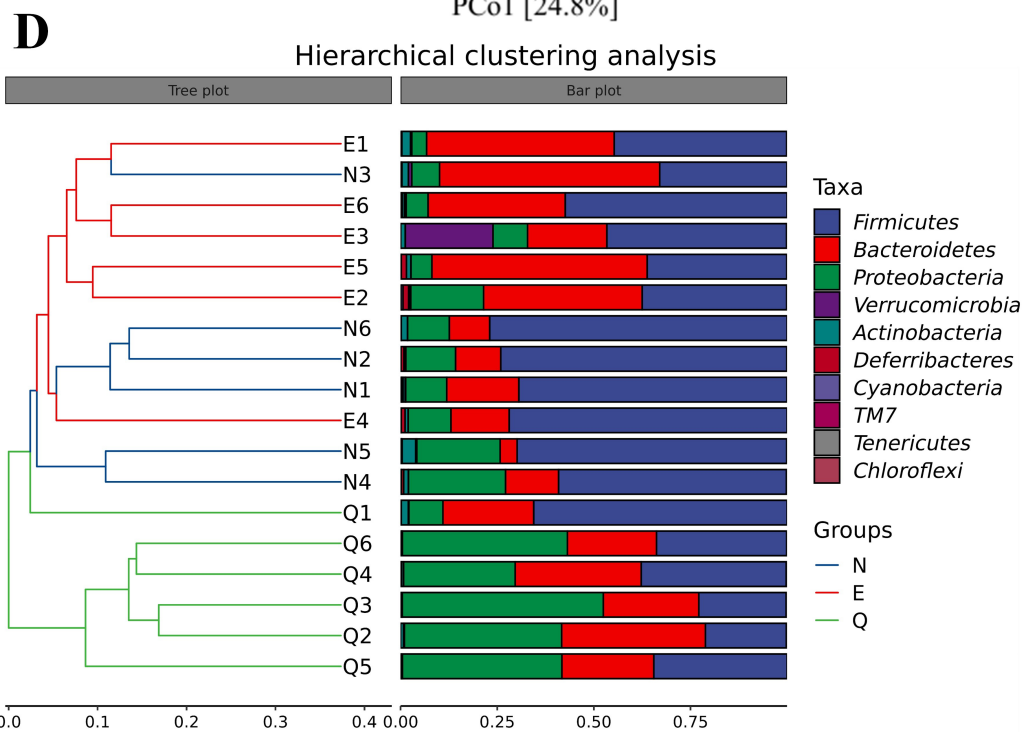

Supplement: d4fo03025g5.pdf [file d4fo03025g5.pdf]
